# Supplementary material for: Acquired drug resistance interferes with the susceptibility of prostate cancer cells to metabolic stress
Source: PubMed Central journal article supplement (PMC9673456; doi:10.1186/s11658-022-00400-1), 2022-11-18

### DCX/MET vs. DCX

PC-3 WT

| ANOVA & post hoc & FC 1.2   | ANOVA & post hoc | SUM | ANOVA & post hoc & FC 1.2 | ANOVA & post hoc | SUM |
|-----------------------------|------------------|-----|---------------------------|------------------|-----|
| 110                         | 1                | 111 | 31                        |                  | 31  |
| DNA replication             |                  |     | Endoplasmic reticulum     |                  |     |
| Cellular response to stress |                  |     |                           |                  |     |
| Chromosome organization     |                  |     |                           |                  |     |
| Primary metabolic process   |                  |     |                           |                  |     |

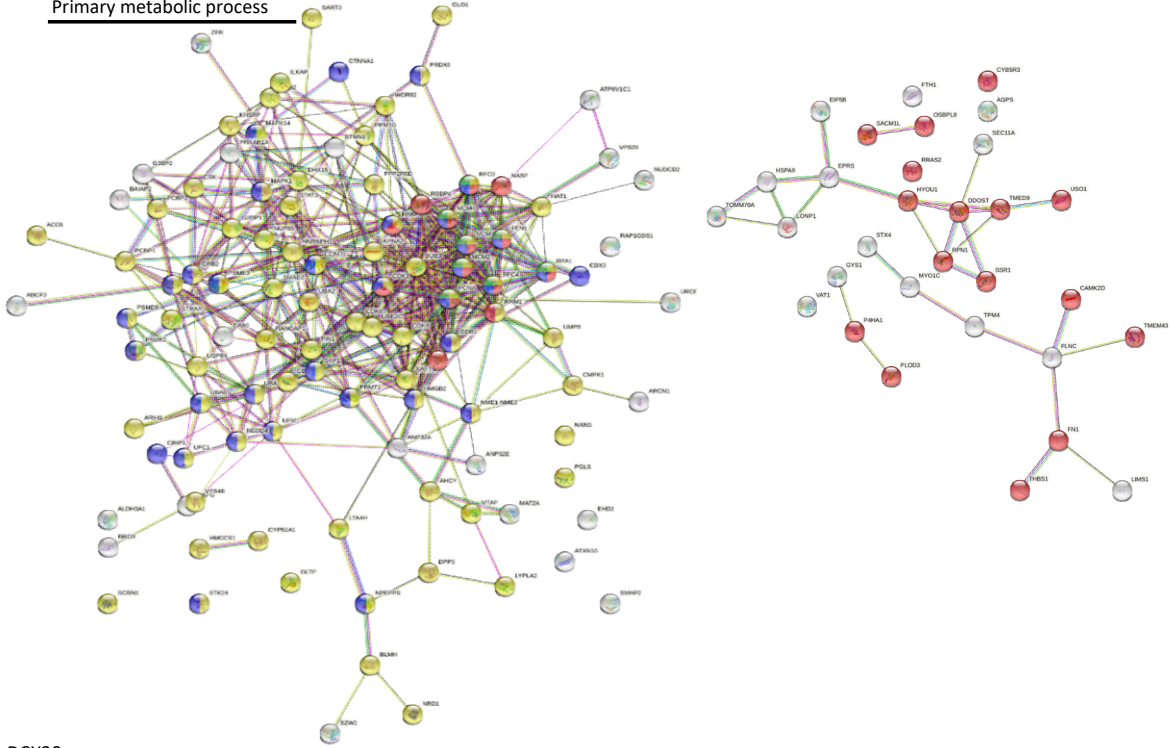

PC-3\_DCX20

| ANOVA & post hoc & FC 1.2                     | ANOVA & post hoc | SUM | ANOVA & post hoc & FC 1.2  | ANOVA & post hoc | SUM |
|-----------------------------------------------|------------------|-----|----------------------------|------------------|-----|
| 44                                            |                  | 44  | 50                         |                  | 50  |
| Regulation of catabolic process               |                  |     | Vesicle-mediated transport |                  |     |
| G1/S transition of mitotic cell cycle         |                  |     | Immune system process      |                  |     |
| Negative regulation of mrna metabolic process |                  |     | Extracellular exosome      |                  |     |
| Cadherin binding                              |                  |     | Phagosome                  |                  |     |
| G1/S Transition                               |                  |     |                            |                  |     |
| VEGFA-VEGFR2 signaling pathway                |                  |     |                            |                  |     |

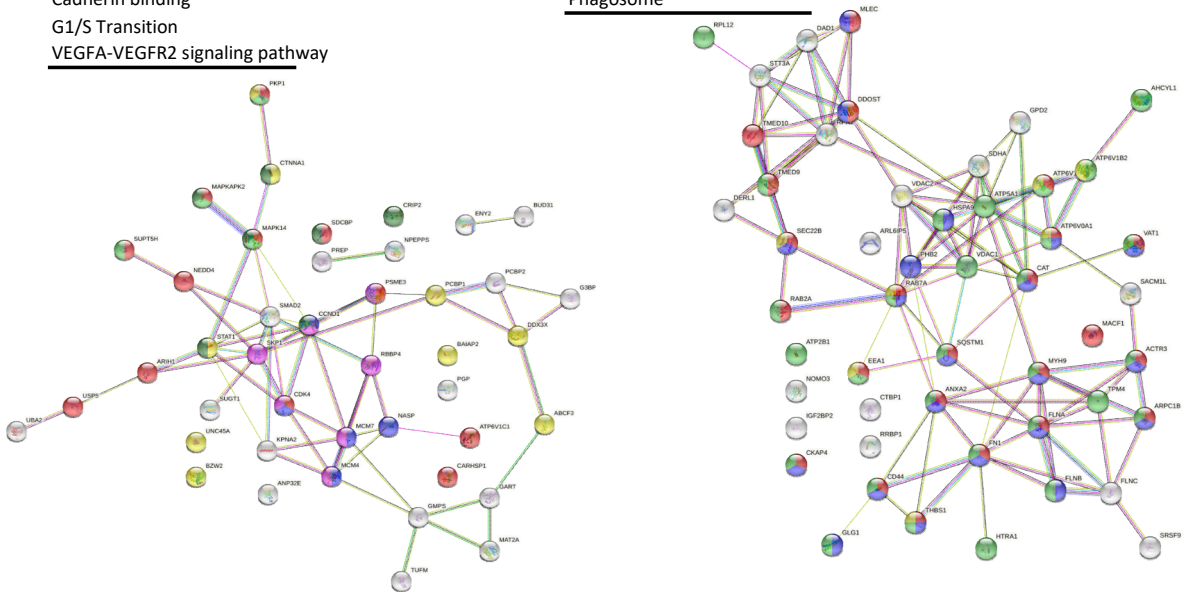

Supplement: 11658_2022_400_MOESM2_ESM.pdf [file 11658_2022_400_MOESM2_ESM.pdf]
