# Supplementary material for: Acquired drug resistance interferes with the susceptibility of prostate cancer cells to metabolic stress
Source: PubMed Central journal article supplement (PMC9673456; doi:10.1186/s11658-022-00400-1), 2022-11-18

**DCX/FF vs. DCX**

PC-3 WT

| ANOVA & post hoc & FC 1.2 | ANOVA & post hoc | SUM | ANOVA & post hoc & FC 1.2 | ANOVA & post hoc | SUM |
|---------------------------|------------------|-----|---------------------------|------------------|-----|
| 71                        | 1                | 72  | 59                        |                  | 59  |

Chromosome organization  
G1/S transition of mitotic cell cycle  
DNA replication

Vesicle-mediated transport  
Transport  
Nucleotide binding  
Protein processing in endoplasmic reticulum

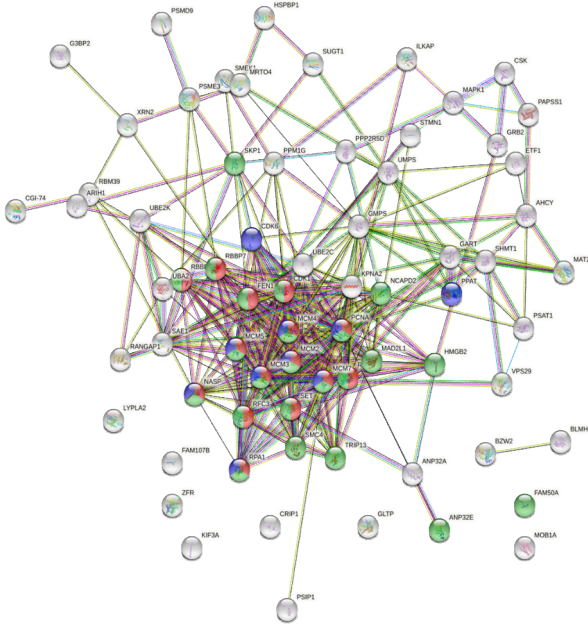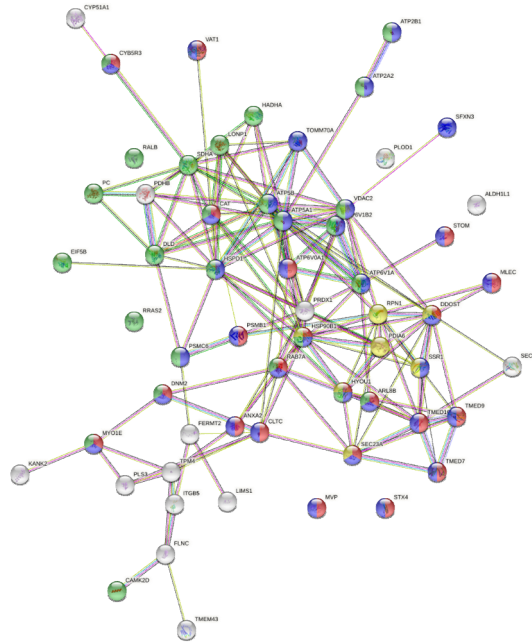

PC-3\_DCX20

| ANOVA & post hoc & FC 1.2 | ANOVA & post hoc | SUM | ANOVA & post hoc & FC 1.2 | ANOVA & post hoc | SUM |
|---------------------------|------------------|-----|---------------------------|------------------|-----|
| 19                        |                  | 19  | 42                        |                  | 42  |

Mitotic cell cycle phase transition  
Chromatin organization  
G1/S Transition

Vesicle-mediated transport  
Immune effector process  
Phagosome acidification  
Immune system process

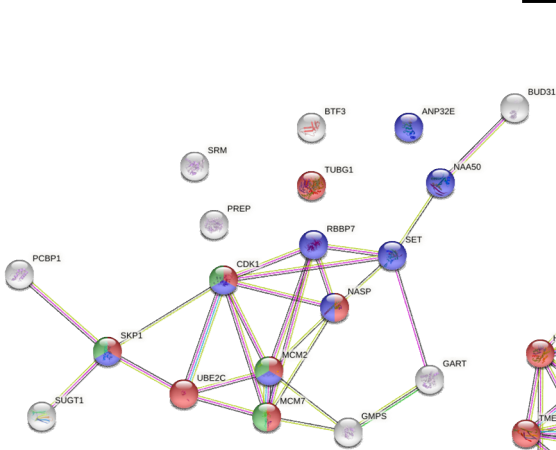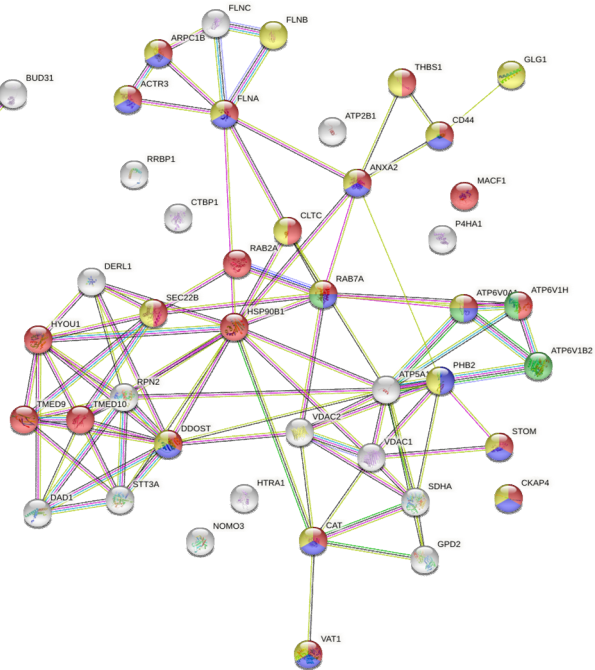

Supplement: 11658_2022_400_MOESM3_ESM.pdf [file 11658_2022_400_MOESM3_ESM.pdf]
